# Supplementary material
Source: PubMed Central journal article supplement (PMC7484342)

# Figure S1

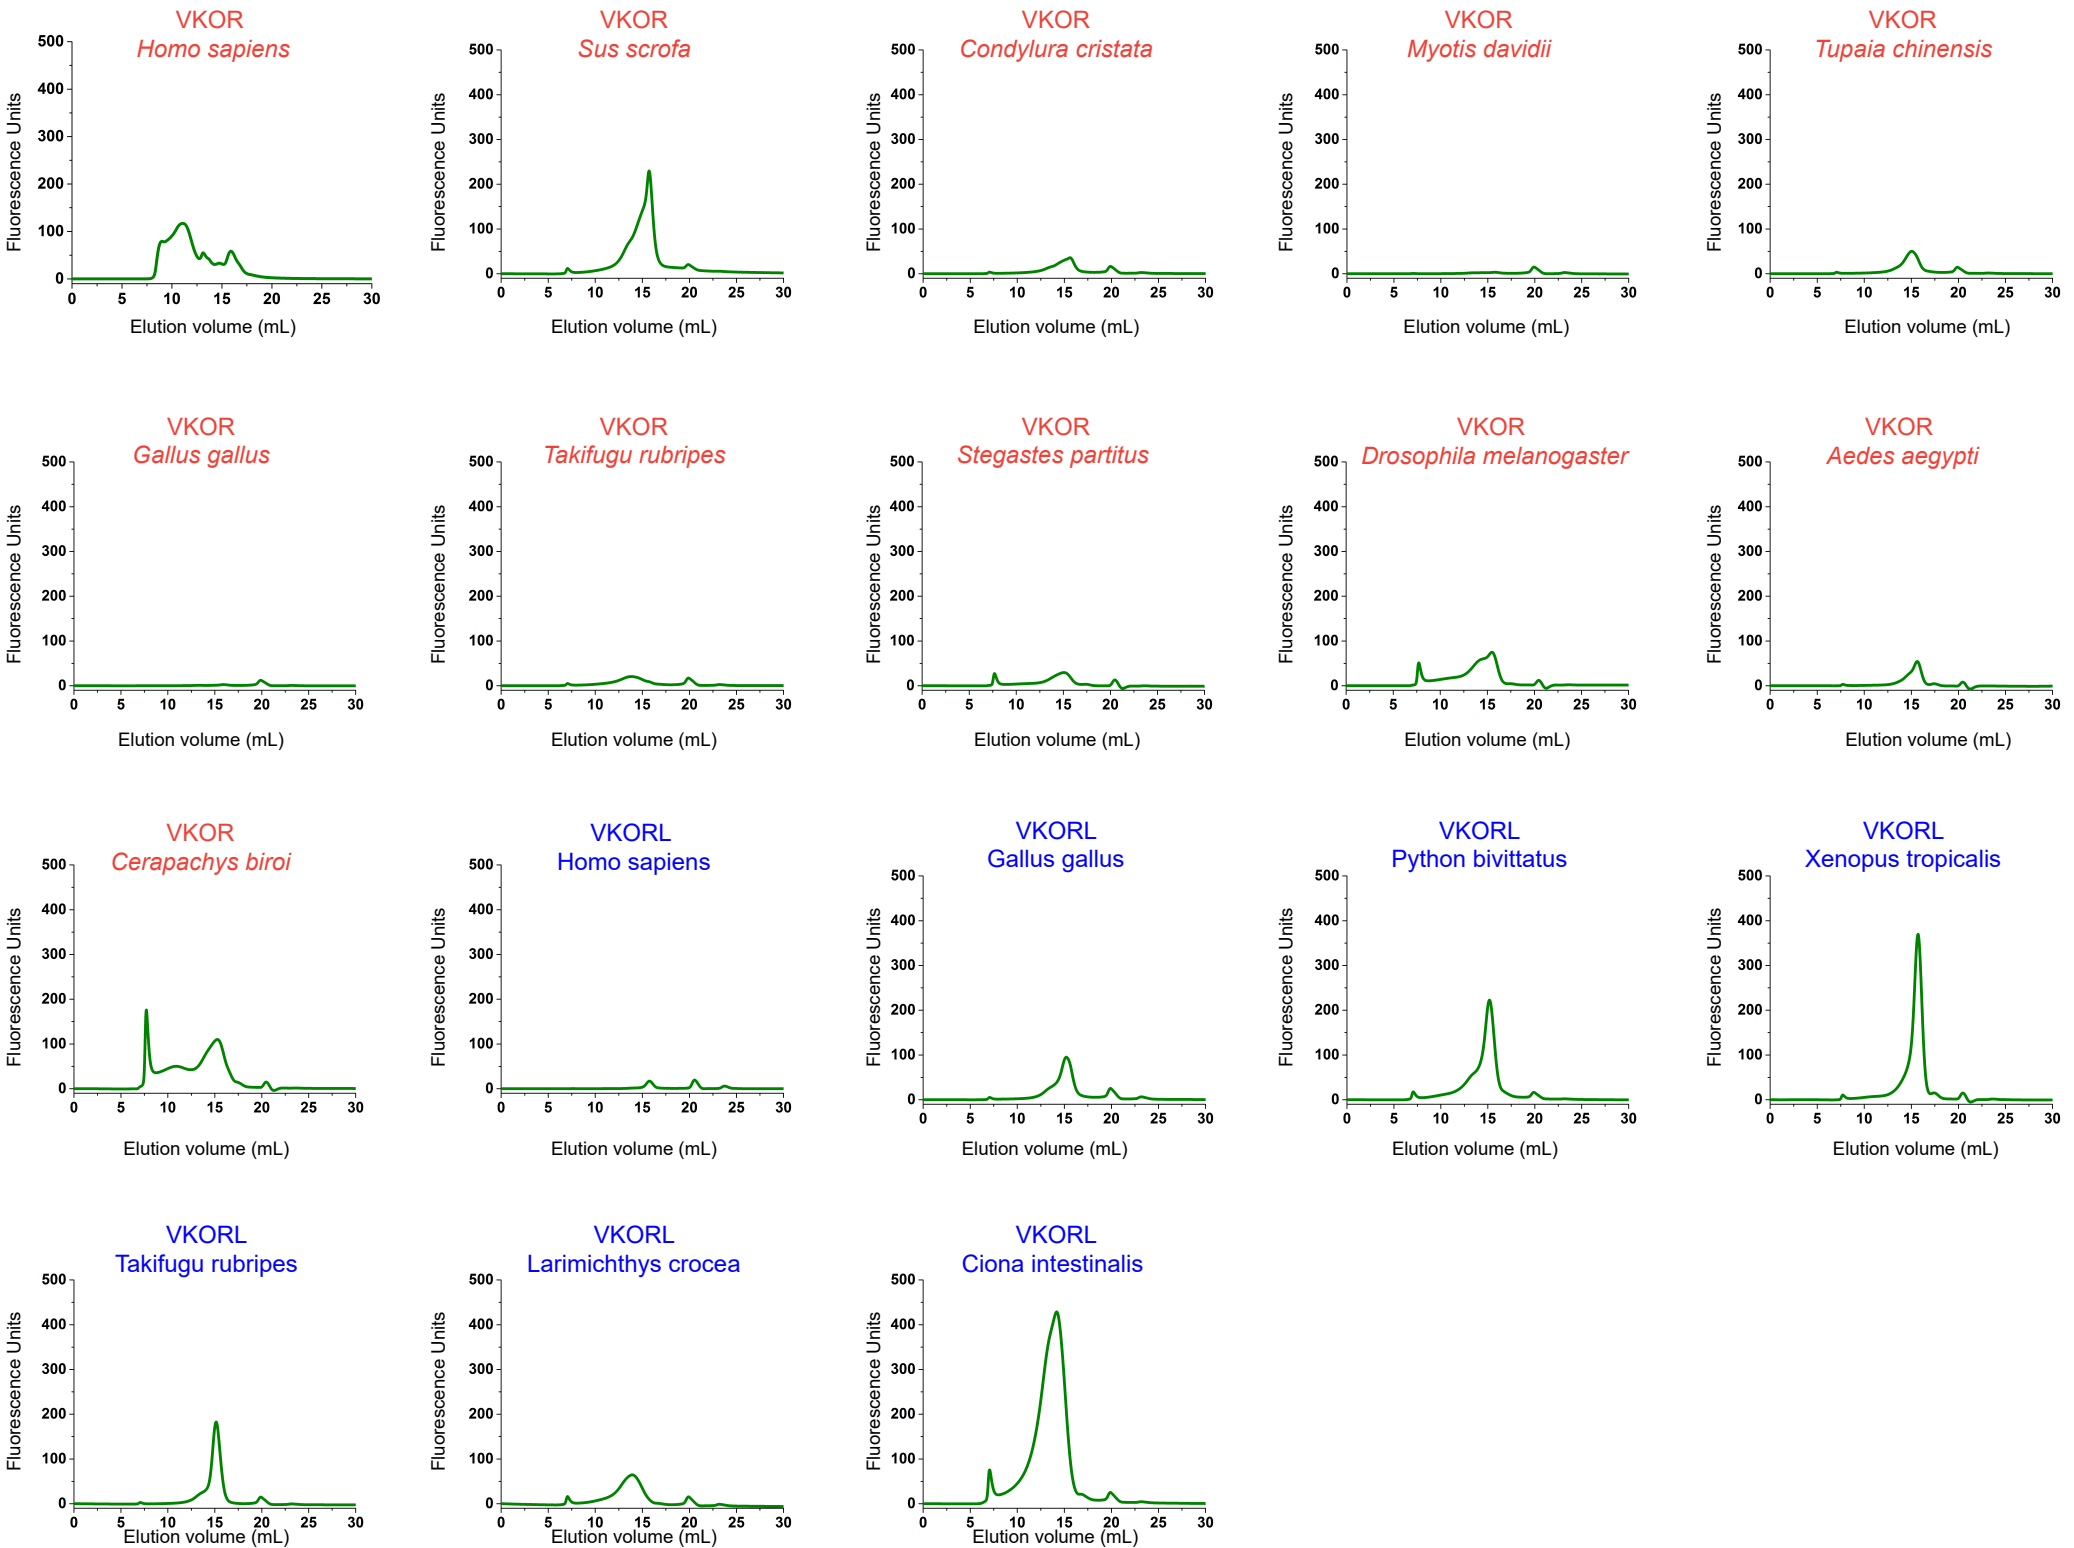

Supplement: NIHMS1608470-supplement-1.pdf [file NIHMS1608470-supplement-1.pdf]

**Figure S2**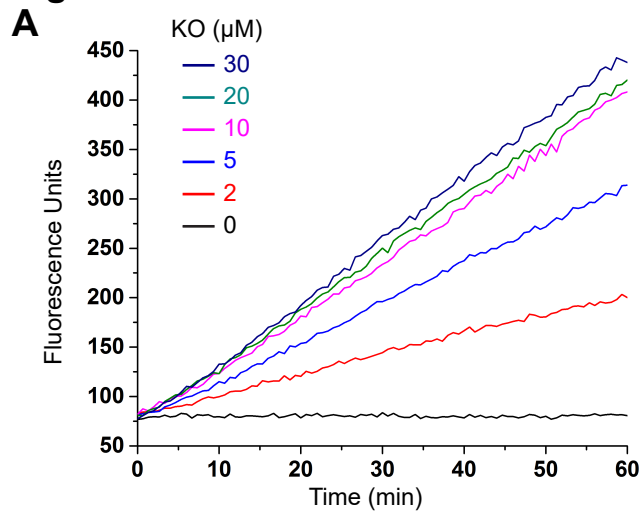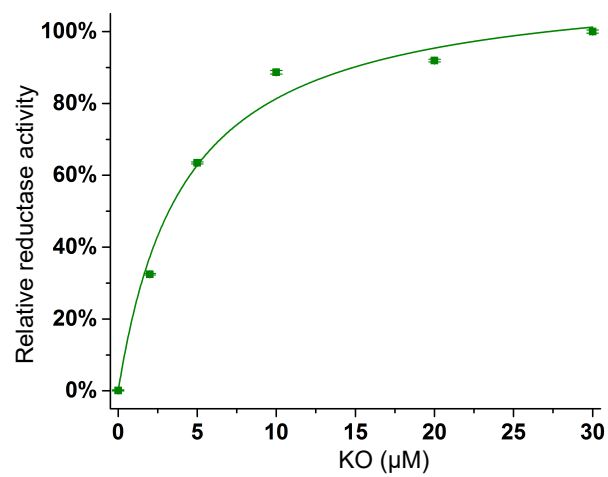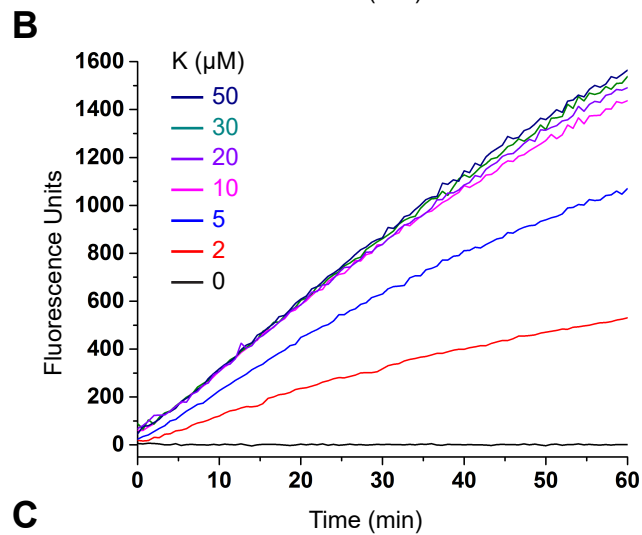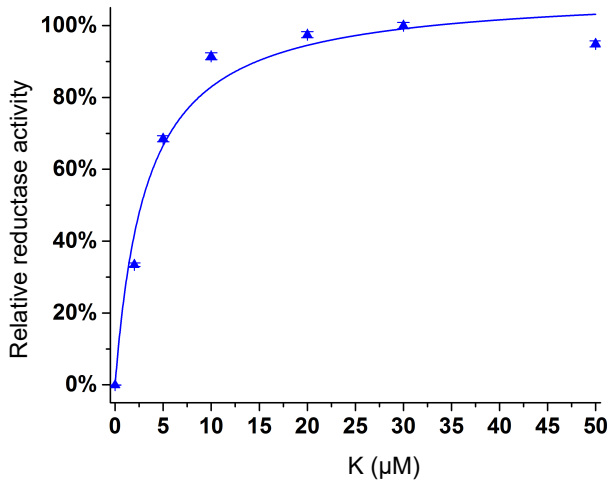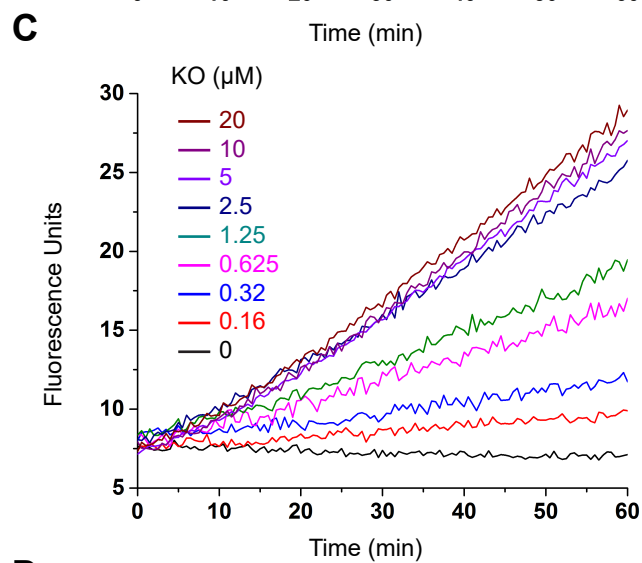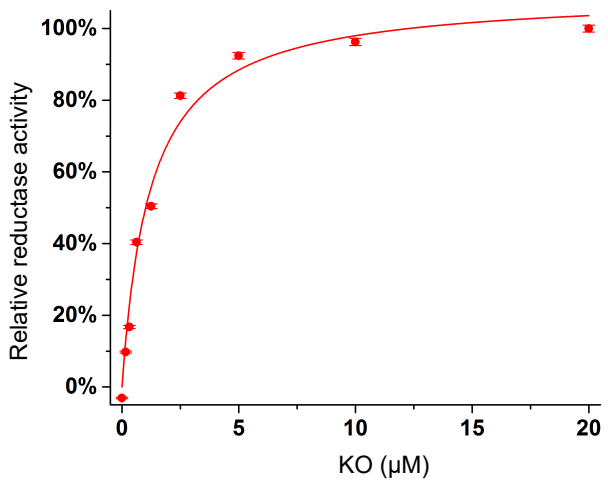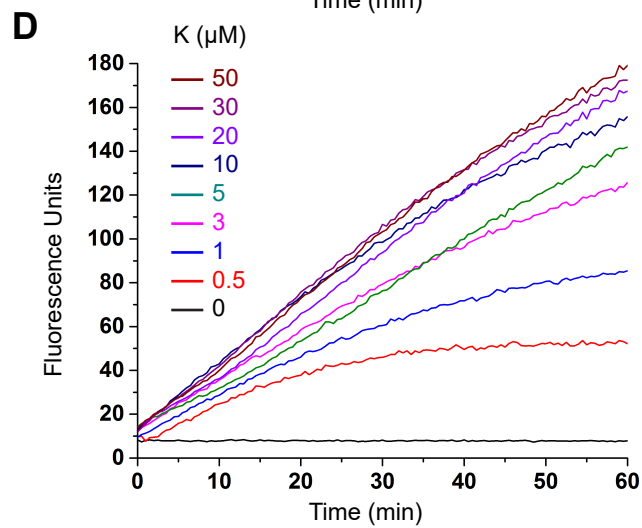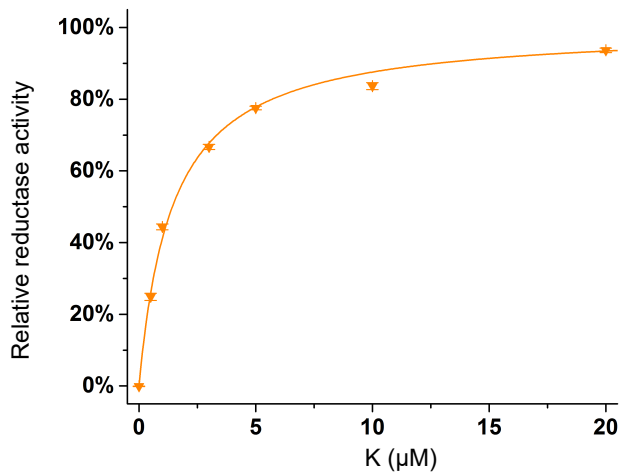

Supplement: NIHMS1608470-supplement-2.pdf [file NIHMS1608470-supplement-2.pdf]
